# Supplementary material for: Genetic diversity of Colletotrichum lupini and its virulence on white and Andean lupin
Source: PubMed Central journal article supplement (PMC8242092; doi:10.1038/s41598-021-92953-y), 2021-06-29
Supplement: 41598_2021_92953_MOESM1_ESM.pdf [file 41598_2021_92953_MOESM1_ESM.pdf]

# **Genetic diversity of *Colletotrichum lupini* and its virulence on white and Andean lupin**

J. A. Alkemade<sup>1</sup>, M. M. Messmer<sup>1</sup>, R. T. Voegelé<sup>2</sup>, M. R. Finckh<sup>3</sup>, P. Hohmann<sup>1\*</sup>

1 Department of Crop Sciences, Research Institute of Organic Agriculture (FiBL), Switzerland

2 Institute of Phytomedicine, University of Hohenheim, Germany

3 Department of Ecological Plant Protection, University of Kassel, Germany

\*Corresponding author

Email: [pierre.hohmann@fibl.org](mailto:pierre.hohmann@fibl.org), Tel: +41 (0)62 865-0476

### Supplementary Figure legends

**Supplementary Figure S1. Principal component analysis (PCA) on strain morphology.** Based on conidia length, width and length width ratio, growth rate on PDA, colony form (circular = 1, most irregular = 4), aerial mycelia (no aerial mycelia = 1, most aerial mycelia = 4), color (palest = 1, darkest = 4) and filiform (yes = 1, no = 0) of 17 *Colletotrichum lupini* strains. Strain codes are followed by genetic group.

**Supplementary Figure S2. Boxplots of conidia length (A), width (B) and colony growth rate (C).** Circles within boxplot indicate mean. Strain codes are followed by abbreviated country of origin and capital letters (A-J) indicating strain morphotype. Different capital letters above boxplots indicate significant differences between strains (Tuckey-HSD,  $p < 0.05$ ).

**Supplementary Figure S3. Multi-locus phylogeny of *Colletotrichum lupini*.** A: UPGMA tree inferred from the combined ITS, TUB2, GAPDH and APN/MAT1 sequence datasets of 50 *Colletotrichum* strains used in this study. Bootstrap support values (>50%) are given at each node. The tree is rooted to *C. acutatum* (CBS 369.73 and CBS 370.73). Strain codes are followed by host, country of origin and morphology (A-J). Grouping is based phylogeny and morphology. Strains used for virulence assays are highlighted in bold.

**Supplementary Figure S4. Representative plants showing disease symptoms of *Colletotrichum lupini* strains on white (*Lupinus albus*) and Andean lupin (*L. mutabilis*).** Lupin seedlings of the different species and accessions (Feodora, Blu-25, LUP 17, LUP 100) were stem inoculated with different *C. lupini* strains 14 days after sowing. Photos and disease score indices (DSI; top right corners) were taken 10 days post-inoculation. Strain codes are followed by country of origin, genetic group and morphotype.

**Supplementary Table S1: Identical sites (%) across the nucleotide dataset per locus.** CaSC indicates variability within *Colletotrichum acutatum* species complex. *C. lupini* indicates variability within *C. lupini*.

|                 | <b>CaSC</b> | <b><i>C. lupini</i></b> |
|-----------------|-------------|-------------------------|
| <b>ITS</b>      | 97          | 99.2                    |
| <b>GAPDH</b>    | 81.1        | 98.4                    |
| <b>TUB2</b>     | 89.9        | 97.8                    |
| <b>APN/MAT1</b> | 75.8        | 97.4                    |

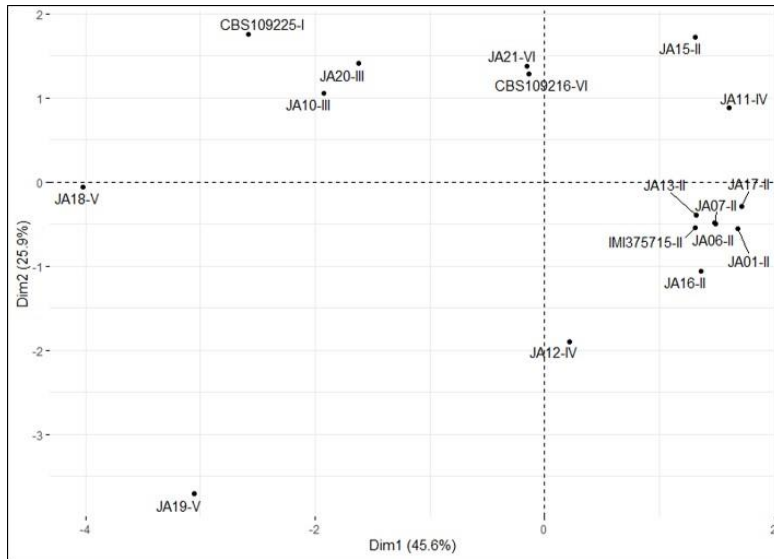

**Supplementary Figure S1. Principal component analysis (PCA) on strain morphology.** Based on conidial length, width and length width ratio, growth rate on PDA, colony form (circular = 1, most irregular = 4), aerial mycelia (no aerial mycelia = 1, most aerial mycelia = 4), color (palest = 1, darkest = 4) and filiform (yes = 1, no = 0) of 17 *Colletotrichum lupini* strains. Strain codes are followed by genetic group.

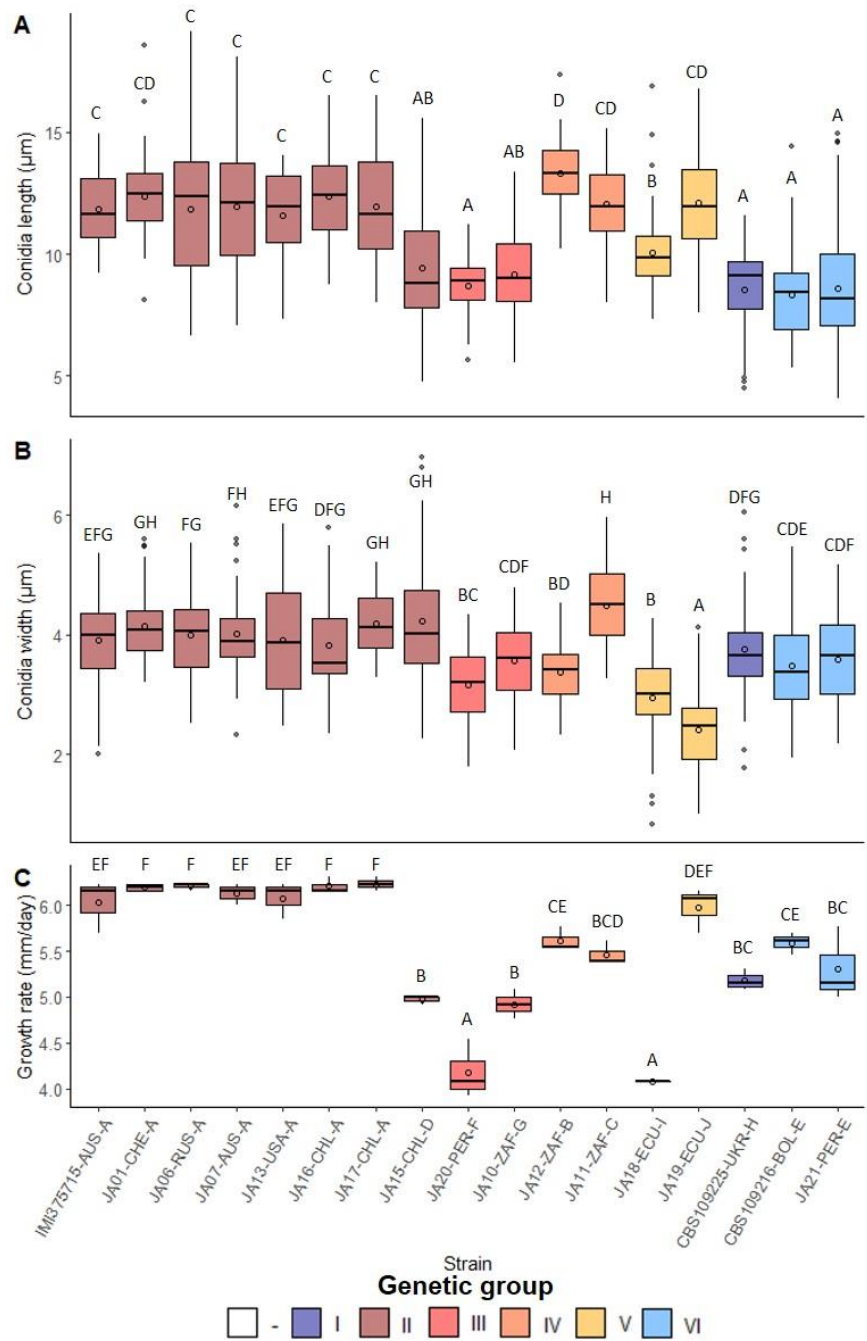

**Supplementary Figure S2. Boxplots of conidia length (A), width (B) and colony growth rate (C).** Circles within boxplot indicate mean. Strain codes are followed by abbreviated country of origin and capital letters (A-J) indicating strain morphotype. Capital letters above boxplots indicate significant differences between strains (Tuckey-HSD,  $p < 0.05$ ).

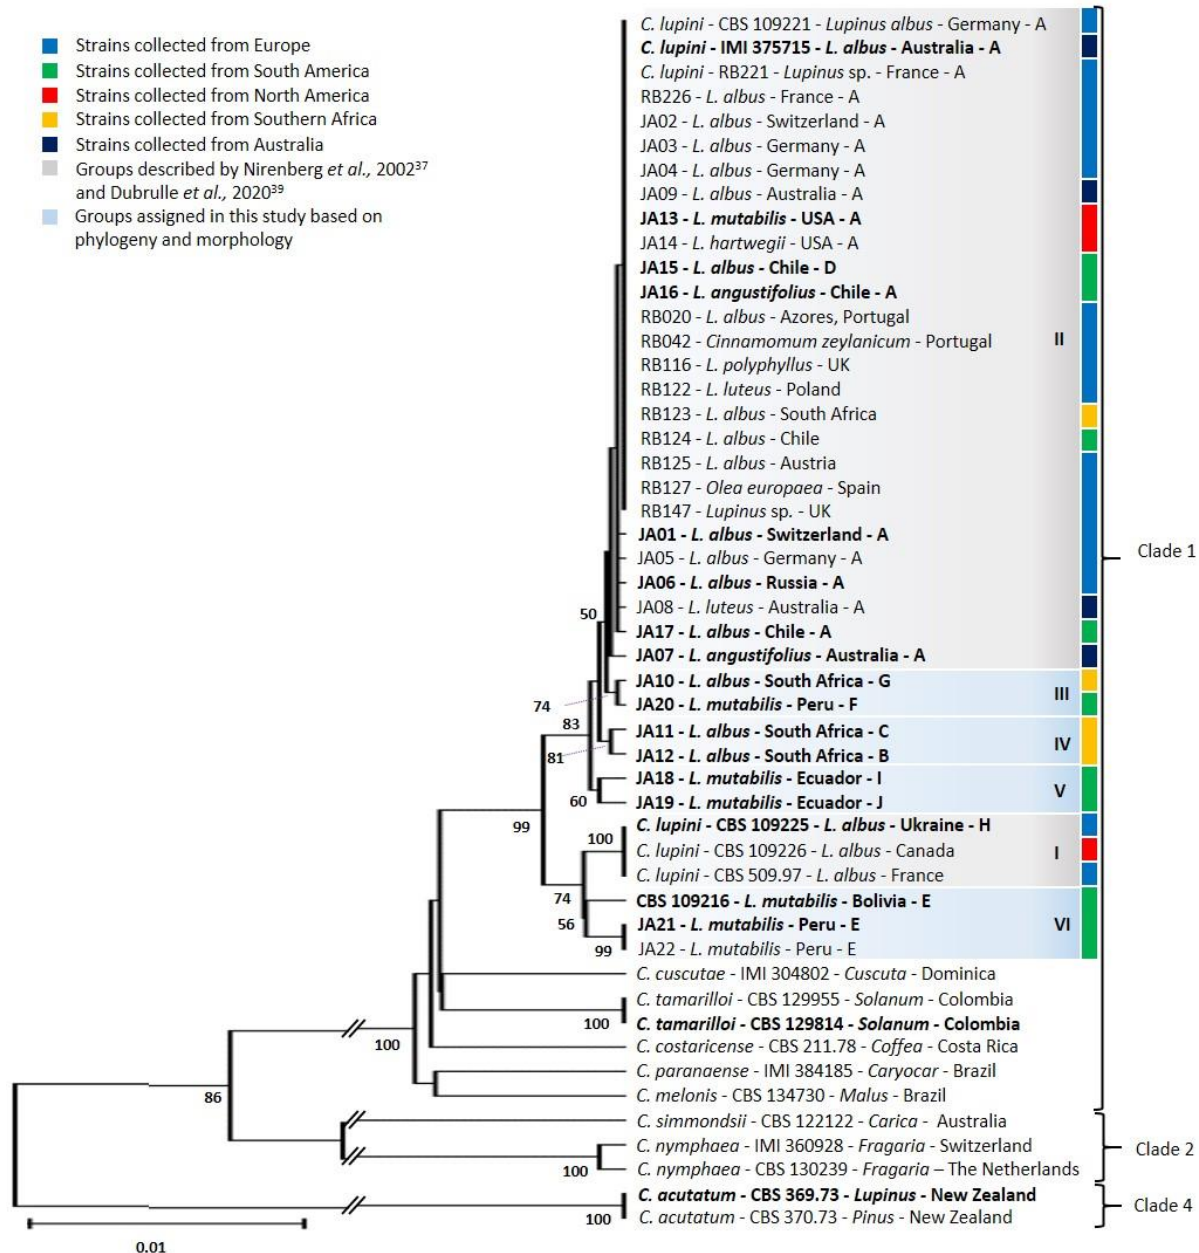

**Supplementary Figure S3. Multi-locus phylogeny of *Colletotrichum lupini*.** UPGMA tree inferred from the combined ITS, TUB2, GAPDH and APN/MAT1 sequence datasets of 50 *Colletotrichum* strains used in this study. Bootstrap support values (>50%) are given at each node. The tree is rooted to *C. acutatum* (CBS 369.73 and CBS 370.73). Strain codes are followed by host, country of origin and morphology (A-J). Grouping is based phylogeny and morphology. Strains used for virulence assays are highlighted in bold.

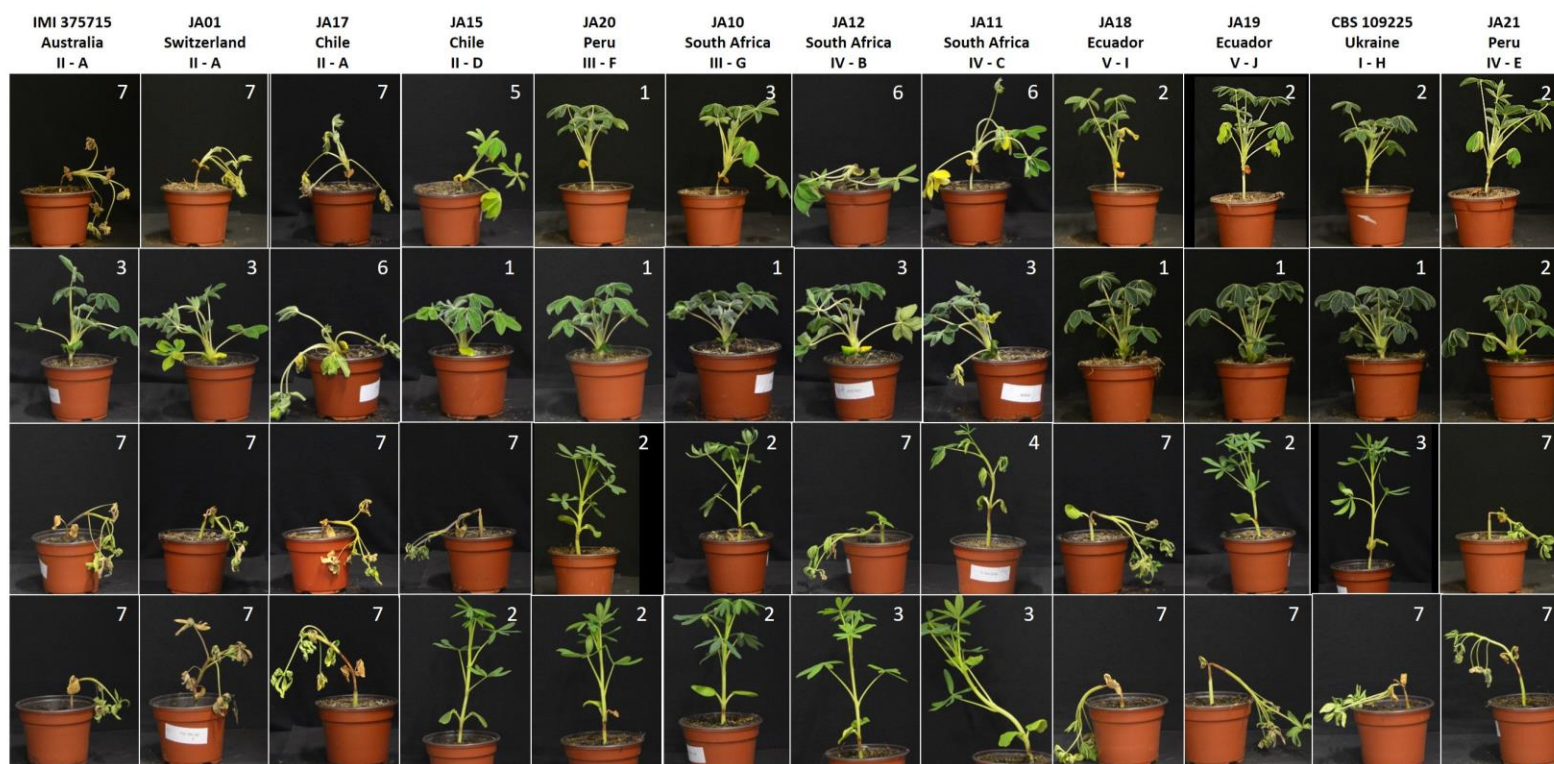

**Supplementary Figure S4. Representative plants showing disease symptoms of *Colletotrichum lupini* strains on white (*Lupinus albus*) and Andean lupin (*L. mutabilis*).** Lupin seedlings of the different species and accessions (Feodora, Blu-25, LUP 17, LUP 100) were stem inoculated with different *C. lupini* strains 14 days after sowing. Photos and disease score indices (DSI; top right corners) were taken 10 days post-inoculation. Strain codes are followed by country of origin, genetic group and morphotype.
